# Supplementary material for: Imatinib Reverses Doxorubicin Resistance by Affecting Activation of STAT3-Dependent NF-κB and HSP27/p38/AKT Pathways and by Inhibiting ABCB1
Source: PubMed Central journal article supplement (PMC3561297; doi:10.1371/journal.pone.0055509), 2013-01-31
Supplement: pone.0055509.s001.pdf [file pone.0055509.s001.pdf]

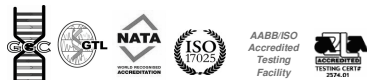

Genetic Testing Laboratories  
 MSC3ARP, Box 30001  
 Las Cruces, New Mexico  
 (866) 833-6895

DNA Safe Autosomal DNA Analysis

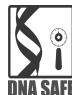

Photo ID's for the persons submitting these samples were not verified by witness.

<ORIGINAL SIGNED REPORT IN COLOR>

Client Identification: Rina Plattner      OID: L11-6674      Report Release Date: 06/17/2011      NLB ANA AUTO      Page 1 of 1

| DNA Donor's Name: BT-549 Cell Line |                |
|------------------------------------|----------------|
| Date Collected:                    | Unknown        |
| STR Locus                          | Alleles Called |
| D3S1358                            | 18             |
| TH01                               | 9,3            |
| D21S11                             | 32,2           |
| D18S51                             | 15             |
| Penta E                            | 14             |
| D5S818                             | 11             |
| D13S317                            | 11, 12         |
| D7S820                             | 9, 10          |
| D16S539                            | 8              |
| CSF1PO                             | 10, 12         |
| Penta D                            | 13             |
| Amelogenin                         | Female (XX)    |
| vWA                                | 15             |
| D8S1179                            | 16             |
| TPOX                               | 8              |
| FGA                                | 19             |

### Understanding This Analysis

DNASafe™, an individual DNA profile, is a permanent means of individual identification. Unlike a name that may be shared, a social security number that can be stolen, or photographs that change over time, your personal DNA identity remains constant from the moment of conception to the end of life. Your DNASafe™ profile demonstrates your genetic similarity to family members as well as the genetic uniqueness that distinguishes you from the rest of the world.

The Genetic Testing Laboratories, Inc. is AAB and ISO 17025:2005 Accredited. These accreditations set the global standard for the technical competence of DNA testing laboratories. You may have complete confidence in these results.

Laboratory Batch Number: 111673130C1

**Comments:**  
 For legal and criminal casework, Chain of Custody documentation is included with this report. DNA amplified with PowerPlex16® System, detected using the ABI PRISM® 3130xl Genetic Analyzer and analyzed with GeneMapper® ID Software. Testing performed by GTL Incorporated, a division of General Genetics Corporation. GTL is an AAB, A2LA, NATA and ISO 17025-2005 Accredited Facility.

 / 06/17/2011  
 Dan J. Slowinski / Date (mm/dd/yy)  
 Laboratory Manager, GTL

### BT-549 ATCC Reference Profile NCI-60 Panel (Lorenzi et al. 2009)

| STR LOCUS  | Alleles |
|------------|---------|
| D3S1358    | N.D.    |
| TH01       | 9.3     |
| D21S11     | N.D.    |
| Penta E    | N.D.    |
| D5S818     | 11      |
| D13S317    | N.D.    |
| D7S820     | 9,10    |
| D16S539    | 8       |
| CSF1PO     | 10,12   |
| Penta D    | N.D.    |
| Amelogenin | X       |
| vWA        | 15      |
| D8S1179    | N.D.    |
| TPOX       | 8       |
| FGA        | N.D.    |
