# Supplementary material for: Imatinib Reverses Doxorubicin Resistance by Affecting Activation of STAT3-Dependent NF-κB and HSP27/p38/AKT Pathways and by Inhibiting ABCB1
Source: PubMed Central journal article supplement (PMC3561297; doi:10.1371/journal.pone.0055509), 2013-01-31

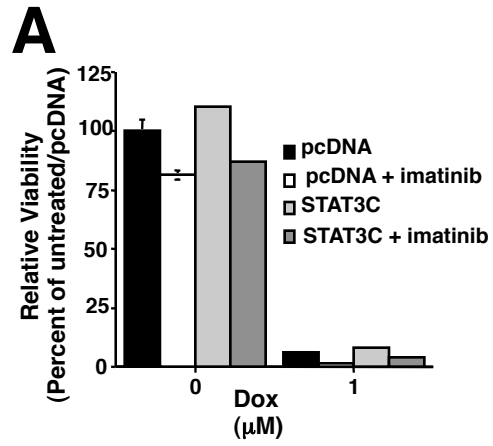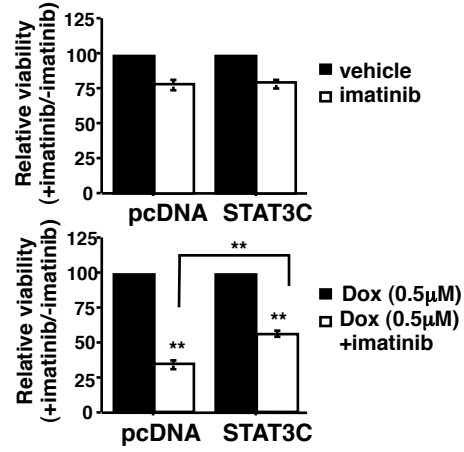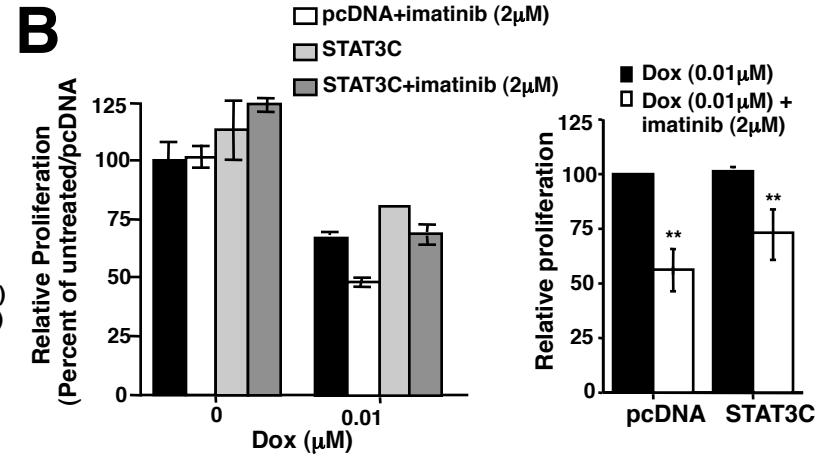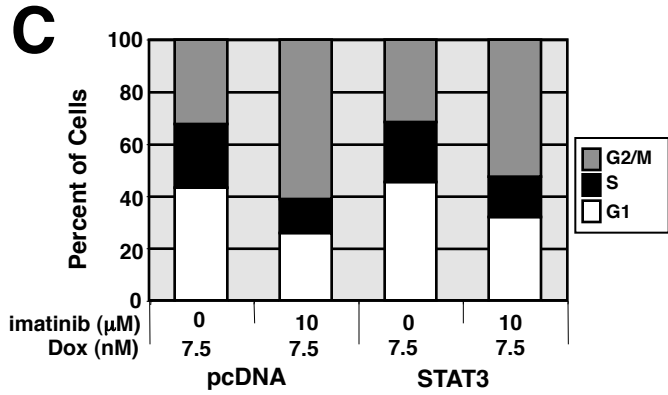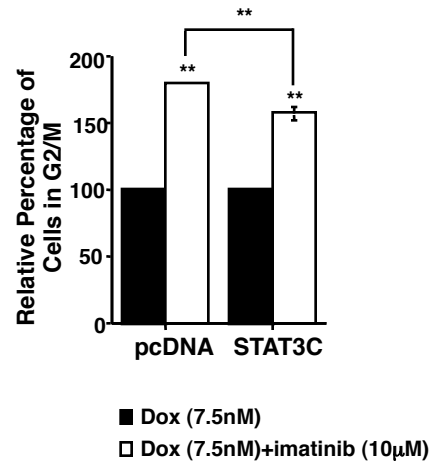

Supplement: pone.0055509.s005.pdf [file pone.0055509.s005.pdf]
